# Supplementary material for: Blockchain in Online Learning: A Systematic Review and Bibliographic Visualization
Source: MDPI journal article supplement (doi:10.3390/su15021470), 2023-01-12
Supplement: s1 [file s1]

Archive with 1 entries (1 files):
- sustainability-2082110-supplementary.pdf
